1 **In silico structure-based analysis of the predicted protein-protein interaction of**  
2 **Syntaxin-18, a putative receptor of *Peregrinus maidis* Ashmead (Hemiptera:**  
3 ***Delphacidae*) with Maize mosaic virus glycoprotein**

4 **Melvin A. Castrosanto<sup>1</sup>, Apel Jae N. Clemente<sup>2</sup>, Anna E. Whitfield<sup>3</sup> and Karen B.**  
5 **Alviar<sup>2</sup>**

6 <sup>1</sup>Institute of Chemistry, College of Arts and Sciences, University of the Philippines  
7 Los Baños, Los Baños, Laguna Philippines 4030

8 <sup>2</sup>Institute of Weed Science, Entomology and Plant Pathology, College of Agriculture  
9 and Food Science, University of the Philippines Los Baños, Los Baños, Laguna  
10 Philippines 4030

11 <sup>3</sup>Department of Entomology and Plant Pathology, North Carolina State University  
12 Campus Box 7613 Raleigh, NC, USA 27695-7613

13

14 **ABSTRACT**

15 The corn planthopper, *Peregrinus maidis*, is a widely distributed insect pest which  
16 serves as a vector of two phytopathogenic viruses, Maize mosaic virus (MMV) and  
17 Maize stripe virus (MStV). It transmits the viruses in a persistent and propagative  
18 manner. MMV is an alphanucleorhabdovirus with a negative-sense, single-stranded  
19 (ss) RNA unsegmented genome. One identified insect vector protein that may serve  
20 as receptor to MMV is Syntaxin-18 (PmStx18) which belongs to the SNAREs  
21 (soluble N-ethylmaleimide-sensitive factor attachment protein receptors). SNAREs  
22 play major roles in the final stage of docking and subsequent fusion of diverse  
23 vesicle-mediated transport events. In this work, in silico analysis of the interaction of  
24 MMV glycoprotein (MMV G) and PmStx18 was performed. Various freely available  
25 protein-protein docking web servers were used to predict the 3D complex of MMV G

26 and PmStx18. Analysis and protein-protein interaction (PPI) count showed that the  
27 complex predicted by the ZDOCK server has the highest number of interaction and  
28 highest affinity, as suggested by the calculated solvation free energy gain upon  
29 formation of the interface ( $\Delta^iG = -31$  kcal/mol). Molecular dynamics simulation of the  
30 complex revealed important interactions at the interface over the course of 50 ns.  
31 This is the first in silico analysis performed for the interaction on a putative receptor  
32 of *P. maidis* and MMV G. The results of the protein-protein interaction prediction  
33 provide novel information for studying the role of STX18 in the transport, docking and  
34 fusion events involved in virus particle transport in the insect vector cells and its  
35 release.

36

37 **Keywords:** alphanucleorhabdovirus; molecular dynamics simulation; protein-protein  
38 docking; Maize mosaic virus; corn planthopper

39

40 Abstract number of words: 264

41 Word count: 4,540

42

43

## 44 INTRODUCTION

45 *Peregrinus maidis* (Ashmead), commonly known as corn planthopper, is just  
46 one of the pests of corn devastating the maize-producing regions mostly in tropical  
47 and subtropical areas.. It is a known vector of two disease-causing plant  
48 pathogens of corn, the *Maize mosaic virus* (MMV) and the *Maize stripe virus*  
49 (MStV) (Jourdan-Ruf et al., 1995). Once *P. maidis* acquires MMV, the virus  
50 persists and replicates in the insect reaching a threshold level in the adult stage  
51 (Barandoc-Alviar et al., 2017). MMV is the causal agent of the mosaic disease of  
52 corn broadly occurring in Africa, Asia, and in the Americas (Centre for Agriculture  
53 and Bioscience International (CABI). The loss of yield due to corn diseases in the  
54 United States and Ontario, Canada accounts for \$76.51 USD per acre in 2012 to  
55 2015 (Mueller et al., 2016). Additionally, an annual loss of \$ 480 million dollars in  
56 the sub-Saharan Africa was reported by Karavina (2014) due to the incidence of  
57 the streak disease of maize. Similarly, a study by Kannan et al. Kannan et al.  
58 (2018) reported that there is 70% loss in the global yield of the commodity since  
59 1920 due to *Maize dwarf mosaic virus* (MDMV). In the Philippines, recent visits in  
60 corn fields in CALABARZON and the Bicol region show *P. maidis* devastation due  
61 to insect damage and visible symptoms of MMV disease in majority of the crops  
62 surveyed.

63 Identification of *P. maidis* receptors for MMV G through high throughput  
64 membrane yeast two hybrid system revealed a putative interacting protein known as  
65 Syntaxin-18 ((Alviar et al., 2022)). This protein belongs to the Syntaxin family,  
66 classified under soluble N-ethylmaleimide-sensitive factor-attachment protein  
67 receptor (SNARE) which is important in membrane fusion (Fasshauer et al., 1998).  
68 Specifically, the proteins in this family play roles in vesicle docking and/or fusion

69 within exocytic as well as endocytic pathways and are principally located in the  
70 endoplasmic reticulum (Hatsuzawa et al., 2000). Moreover, SNARE proteins could  
71 either be vesicle membrane SNAREs (v-SNAREs) or target membrane SNAREs (t-  
72 SNAREs) (Yoon & Munson, 2018). Syntaxin-18 (STX18) is a t-SNARE protein (Bossis  
73 et al., 2005; UniProtKB).

74 Protein protein interaction (PPI) is involved in various biological processes  
75 such as cell-to-cell interactions, and metabolic and developmental control (Rao et al.,  
76 2014). Targeting PPIs has recently become a strategy in drug development due to  
77 their association with diseases (Lu et al., 2020). Several research papers on  
78 prediction of PPIs between protein sequences usually employ in silico analysis which  
79 utilizes methods such as sequence-based and structure-based approaches. In this  
80 paper, the 3D structure of MMV G and PmStx18 were modeled and refined. Then,  
81 the protein-protein interaction of MMV G and PmStx18 was explored and the  
82 interacting residues at the interface were identified. Molecular dynamics simulation  
83 was conducted to monitor the stability of the predicted complex.

84

## 85 **MATERIALS AND METHODS**

### 86 **Homology modelling of PmStx18 and MMV G**

87 The protein sequence of MMV G was retrieved from the protein database of  
88 NCBI. Both the protein sequences of PmStx18 and MMV G were submitted to I-  
89 TASSER (Iterative Threading Assembly Refinement) server found (Yang et al.,  
90 2015) for the prediction of the proteins' secondary and tertiary structure as well as  
91 the binding sites.

92

### 93 **Model validation and refinement**

94           The initial homology models (MMV G and PmStx18) were validated using the  
95 SWISS-MODEL structure assessment tool, noting the MolProbity score,  
96 Ramachandran favored, Ramachandran outliers, and rotamer outliers (Artimo et al.,  
97 2012). Then, refinement was done via GalaxyWEB GalaxyRefine tool (Ko et al.,  
98 2012) to improve the quality of the models. GalaxyWEB is a web server for protein  
99 structure prediction, refinement, and related methods developed by the  
100 Computational Biology Lab, Department of Chemistry, Seoul National University (Ko  
101 et al., 2012). The refined models were again validated and compared to the initial  
102 models.

103

#### 104 **Protein-Protein Docking**

105           The possible interaction between MMV G and PmStx18 were predicted  
106 through protein-protein docking using three different webservers – PatchDock  
107 (Schneidman-Duhovny et al., 2005), ZDOCK (Pierce et al., 2014), HADDOCK (De  
108 Vries et al., 2010), InterEvDock2 (Quignot et al., 2018), pyDockWEB (Jiménez-  
109 García et al., 2013), LZerD (Christoffer et al., 2021), Vakser Lab (Tovchigrechko &  
110 Vakser, 2006), ClusPro 2.0 (Kozakov et al., 2017), and HDOCK (Yan et al., 2020). The  
111 best model in all protein-protein docking web servers were refined using GalaxyWEB  
112 GalaxyRefineComplex (Heo et al., 2016). Then, the refined complexes were  
113 subjected to PDBePISA (Krissinel & Henrick, 2007) analysis, where the interactions at  
114 the interface and the solvation free energy gain upon the formation of the interface  
115 ( $\Delta^iG$ ) were calculated. The MMV G-PmStx18 docking pose having a more negative  
116  $\Delta^iG$  and more interaction at the interface was visualized and was chosen to undergo  
117 molecular dynamics simulation.

#### 118 **Molecular dynamics simulation**

119 To obtain the thermally equilibrated system of the MMV G-PmStx18 complex,  
120 it was subjected to MD simulation using Desmond (Bowers et al., 2006). The  
121 complex was solvated with water molecules using the SPC model in the Desmond  
122 System Builder tool. An orthorhombic simulation box shape with distances of 4.0 Å x  
123 4.0 Å x 10.0 Å was generated. The system was neutralized by adding Na<sup>+</sup> and Cl<sup>-</sup>  
124 and 0.15 M salt concentration to conserve isosmotic condition. The simulation (NPT)  
125 was set to 50 ns with a recording interval of 50 ps at 300 K and 1.01325 bar.  
126 Comparison of the initial and final frame of the simulation was done by overlapping  
127 the structures. Distance of initial hydrogen bonding interactions were also monitored  
128 over the course of the simulation.

129

## 130 **RESULTS AND DISCUSSION**

131 The *Maize mosaic alphanucleorhabdovirus* (MMV) which is vectored by a  
132 delphacid planthopper, *Peregrinus maidis*, is the known causative agent of mosaic  
133 disease of corn. Advancements in management and control approaches have been  
134 developed throughout the years where most of them now are designed to work at the  
135 molecular level. A study by Yao et al. (2013) presented an RNAi-based gene  
136 knockdown in *P. maidis* by targeting essential genes through oral delivery and  
137 microinjection of ATPase B and V-ATPase D double-stranded RNA (dsRNA).  
138 Similarly, another molecular protocol has been introduced by Klobasa et al. (2021)  
139 which employs CRISPR/CAS9 genome editing in *P. maidis* embryos as basis for  
140 gene silencing and germline transformation.

141 An important prerequisite of development of molecular-based methods in  
142 management of corn pests and diseases relies on the knowledge of the interaction of  
143 vector and pathogen. It has been previously reported that plant rhabdovirus

144 glycoprotein spikes are predicted to interact with receptors in the midgut allowing the  
145 entry of virions into the epithelial cells (Dietzgen et al., 2016). However, there is still  
146 limited knowledge on the mechanism of interaction of the receptor protein of *P.*  
147 *maidis* and MMV glycoprotein (MMV G) which may explain the mechanism of  
148 infection, replication, and intercellular dissemination of viral particles within the insect  
149 host. In connection with this, in silico analysis was carried out in this work to  
150 investigate the putative t-SNARE STX18 of *P. maidis* (PmStx18) and its interaction  
151 with MMV G. It is assumed that this interaction has a significant role in mediating the  
152 infection of MMV within its insect vector host.

153

#### 154 **Homology Modelling of PmStx18 and MMV G**

155 Both protein sequences of PmStx18 and MMV G were submitted to I-  
156 TASSER to generate the three-dimensional models. Predicted 3D models are  
157 provided with C-score, TM-score and RMSD. In I-TASSER, the confidence score (C-  
158 score) is calculated based on the significance of threading template alignments with  
159 values ranging from [-5, 2] where a C-score greater than -1.5 signifies a model of  
160 correct topology (Zhang, 2008). Both the template modeling score (TM-score) and  
161 root mean square deviation (RMSD) are known standards for measuring the  
162 accuracy of structure modeling. A TM-score greater than 0.5 indicates similar  
163 topology between two predicted structures and a TM-score which is less than or  
164 equal to 0.17 indicates similarity between two randomly selected structure from the  
165 PDB library (Zhang, 2008). The average distance of all residue pairs between two  
166 structures is measured by RMSD while TM-score measures structural similarity.  
167 According to Roy et al. (2010), predicted structures with 1–2 Å RMSD are high-  
168 resolution models which are generated from close homologous template. Structures

169 with RMSD of 2~5 Å are medium-resolution models generated from threading of  
170 distantly homologous templates but can still be used for identification of functionally  
171 important residues (Roy et al., 2010). Furthermore, the TM-score function is the  
172 proposed scale to solve the problem with RMSD since the latter is sensitive to local  
173 error while the former is independent of the protein length, thus, template aligned  
174 regions may have better quality due to fewer residues than full-length model (Zhang &  
175 Skolnick, 2005).

176 PmStx18 and MMV G structures were not chosen based on the rank provided by  
177 I-TASSER but rather based on the C-score values considering the C-score cutoff of -  
178 1.5. Figure 1 shows the I-TASSER predicted structures of PmStx18 and MMV G.  
179 Based on the C-score cutoff, both the generated models of PmStx18 and MMV G  
180 have the best quality among the given models as indicated by their C-score values of  
181 -1.11 and -1.32, respectively. Moreover, PmStx18 has an RMSD of  $7.4 \pm 4.2$  Å while  
182 MMV G has  $15.4 \pm 3.4$  Å. Although the two structures may not be as accurate due to  
183 their high RMSD values, it could still be considered that the predicted structure for  
184 PmStx18 is of correct global topology since its calculated TM-score of  $0.58 \pm 0.14$  is  
185 greater than the cutoff value, indicating good structure. For MMV G, its TM-score of  
186  $0.37 \pm 0.13$  may not be greater than the cutoff value, however, it is significantly close  
187 to 0.5 and does not indicate random similarity.



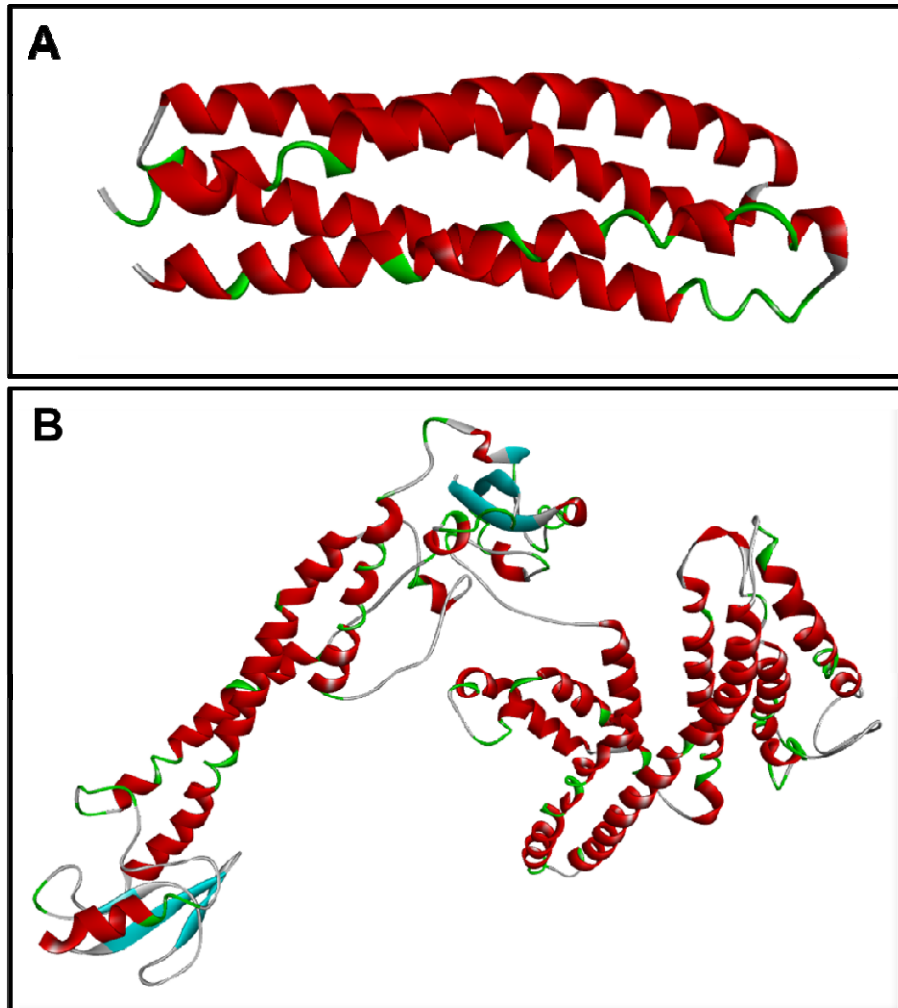

188

189 **Figure 1.** Three-dimensional models of PmStx18 (A) and MMV G (B) predicted in I-  
190 TASSER (helix – red; blue – strand; green/gray – turn/coils).

191 A confidence score ranging from 0 -9 were also provided to indicate the  
192 confidence of the predicted secondary structure. From the prediction, PmStx18 have  
193 54 coils and 116 helices whereas the latter is found mostly at positions 61-140. Most  
194 of the helices were scored with 8 and 9 while the coils have scores ranging from 0-6  
195 (Supplemental figure—Appendix 1). Majority of MMV G are mostly coils with 307  
196 residues, while helices and strands are only 147 and 137, respectively. Most of the  
197 helices are found at positions 300 to 340, as well as in between 520 to 580 having

198 confidence scores which mostly range from 7-9. Additionally, coils are mostly found  
199 at positions 20-60, 120-280 and 440-520 while the strands are scattered in the  
200 sequence (Supplemental figure—Appendix 2).

201

## 202 **Model validation and refinement**

203 The initial models (MMV G and PmStx18) generated by the I-TASSER web  
204 server needs significant structural improvement as suggested by the high  
205 percentage of Ramachandran outlier residues (Figure 2 – left plots). Red dots in the  
206 plot indicates individual residues. Those residues lying on the white region  
207 represents the outliers and needs to be corrected. On the other hand, residues lying  
208 on a darker green region implies that their positioning, as well as their  
209 stereochemistry are favored. After subjecting to structural refinement using the  
210 GalaxyRefine of GalaxyWEB server, which performed repeated structure  
211 perturbation and subsequent overall structural relaxation by molecular dynamics  
212 simulation, improvement of the Ramachandran plots was evident as more of the  
213 residues clumped on the darker green regions. Moreover, the lowering of MolProbity  
214 score and rotamer outliers (Table 1) for both MMV G and PmStx18 models signifies  
215 a better protein model. MolProbity provides a score that is based on the model  
216 quality at both the global and local levels (Chen et al., 2010). A lower score indicates  
217 better model quality. The correctness of the sidechain prediction is characterized by  
218 the rotamer outliers – having a low outlier means a better model.

219

220

221 **Table 1.** Structural refinement of the initial model of MMV G and PmStx18 predicted  
222 by the I-TASSER web server.

|                          | MMV G   |         | PmStx18 |         |
|--------------------------|---------|---------|---------|---------|
|                          | Initial | Refined | Initial | Refined |
| MolProbity Score         | 2.85    | 1.96    | 2.28    | 1.43    |
| Ramachandran favored (%) | 76.47   | 92.70   | 88.04   | 97.02   |
| Rotamer outlier (%)      | 12.88   | 0.77    | 10.90   | 0.00    |

223

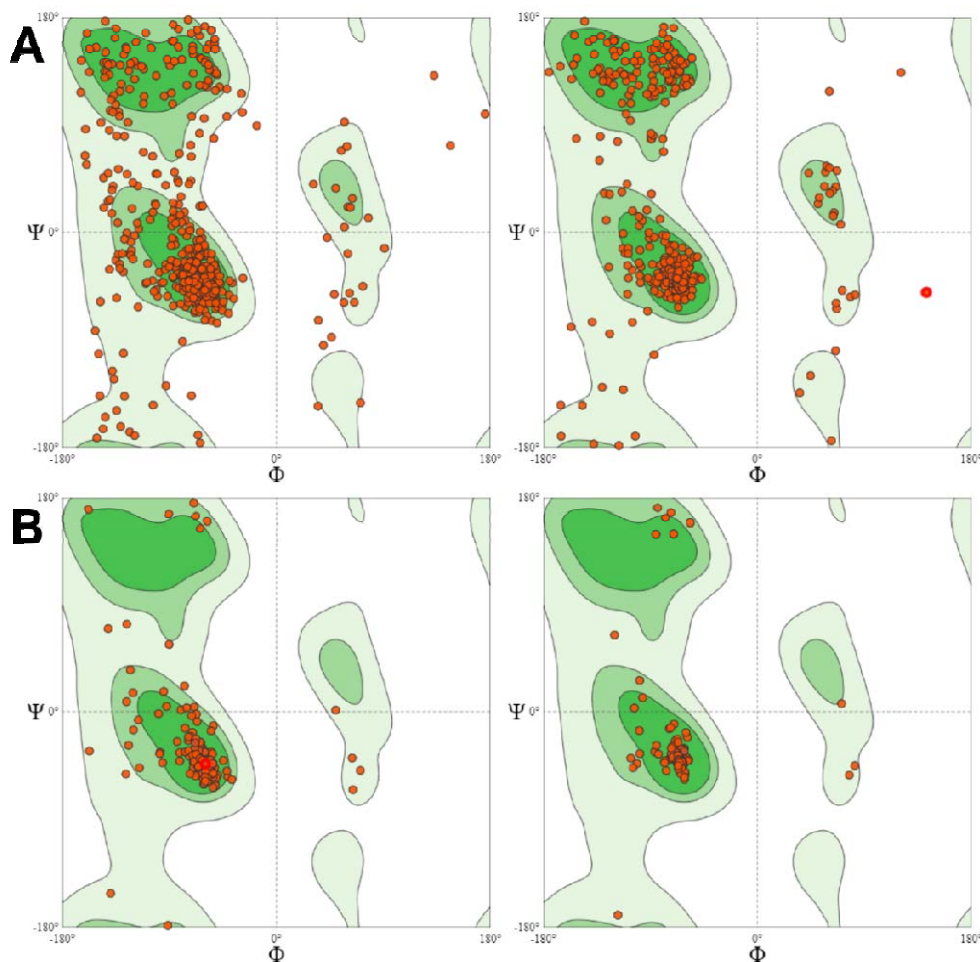

224

225 **Figure 2.** Ramachandran plots of the (A) MMV G and (B) PmSTX models (left)  
226 before and (right) after structural refinement.

### 227 **Protein-protein Docking**

228 Various protein-protein docking web servers were used to predict the possible  
229 binding pose of MMV G with PmStx18 (Table 2). Although HADDOCK predicted a  
230 complex with a higher absolute  $\Delta^iG$ , ZDOCK complex was chosen for further

231 experiments due to its relatively high absolute  $\Delta^iG$  and the number of interactions at  
232 its interface. ZDOCK complex ranked 2<sup>nd</sup> in the highest  $\Delta^iG$ , 2<sup>nd</sup> in the highest  
233 number of hydrogen bonding, 2<sup>nd</sup> in the highest number of salt bridges, and 1<sup>st</sup> in the  
234 highest number of vdW interaction. The 3D conformation of ZDOCK complex is  
235 shown in Figure 3, together with the respective residues present at the interface  
236 (MMV G – violet; PmStx18 – orange). The specific interaction of MMV G residues  
237 with PmStx18 residues are listed in Table 3 with the format MMV G: PmStx18.  
238 Notable MMV G residues with multiple interactions are C71, R87, W175, K233, and  
239 D279.

240

241 **Table 2.** Characterization of the predicted MMVG-PmStx18 complex by different  
242 protein-protein docking web servers.

| Docking Server | $\Delta^iG$ , kcal/mol | Hydrogen bonds | Salt Bridges | Pi-stacking | vdW interaction |
|----------------|------------------------|----------------|--------------|-------------|-----------------|
| HADDOCK        | -33.4                  | 2              | 1            | 4           | 21              |
| ZDOCK          | -31.0                  | 9              | 2            | 1           | 35              |
| VakserLab      | -30.8                  | 8              | 1            | 0           | 34              |
| PatchDock      | -29.6                  | 15             | 0            | 0           | 21              |
| LZerd          | -29.1                  | 6              | 0            | 1           | 22              |
| InterEvDock    | -22.9                  | 0              | 1            | 0           | 17              |
| ClusPro        | -20.3                  | 5              | 3            | 1           | 14              |
| pyDockWEB      | -18.8                  | 0              | 0            | 1           | 25              |
| HDOCK          | -16.9                  | 5              | 2            | 0           | 13              |

243

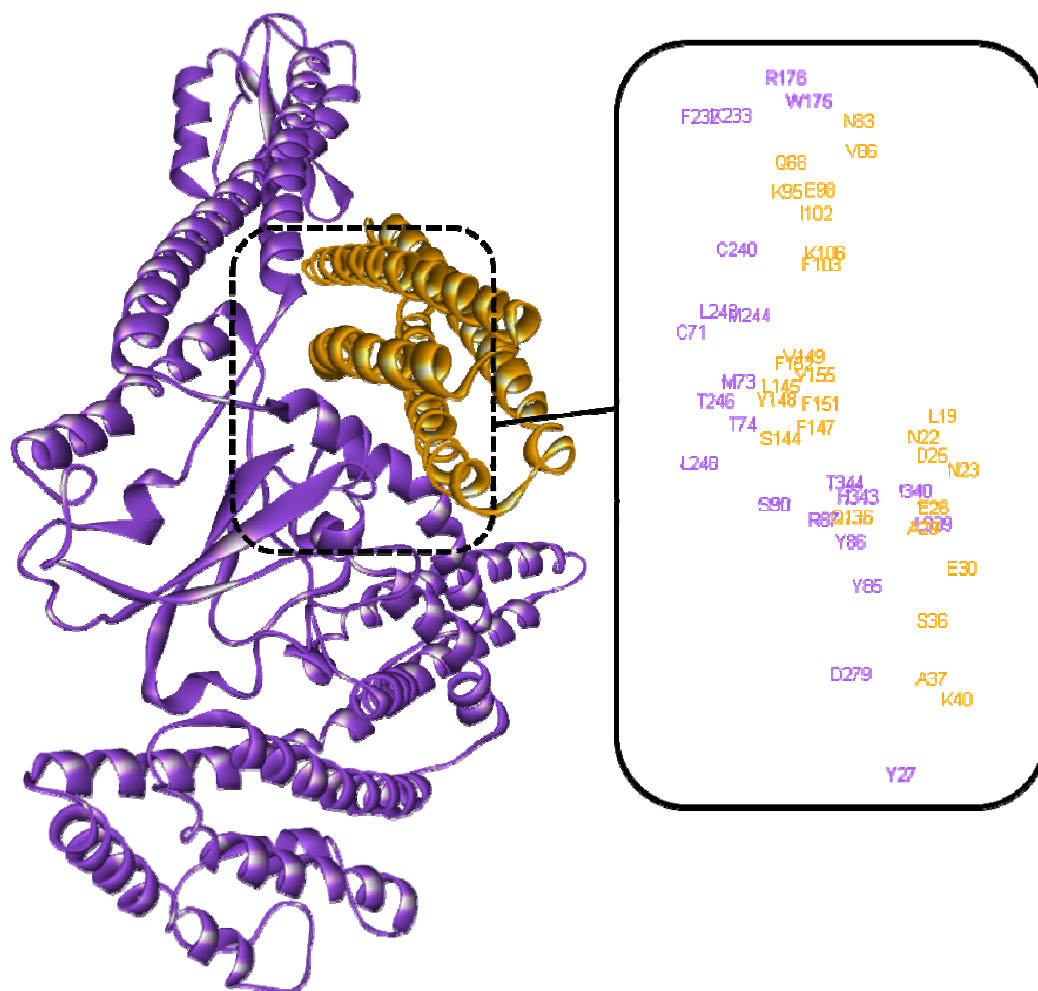

244

245 **Figure 3.** The 3D structure of MMV G-PmStx18 as predicted by the ZDOCK  
246 webserver showing the residues interacting at the interface (MMV G – violet;  
247 PmStx18 – orange).

248

249

250

251

252

253

254 **Table 3.** Interacting residues at the interface of the predicted MMVG-PmStx18

255 complex using ZDOCK web server (Format = MMVG: PmStx18). The underlined  
256 MMV G residues means that it interacts with more than one type of interaction.

| Hydrogen Bonds             | Pi-Stack   | Salt Bridges      | vdW interaction        |
|----------------------------|------------|-------------------|------------------------|
| <u>C71</u> : F152          | H343: F147 | <u>R87</u> : D25  | <u>C71</u> : Y148      |
| Y85: E30                   |            | <u>K233</u> : E98 | M73: F151, F152, V155  |
| <u>R87</u> : N22, D25, E26 |            |                   | T74: F151              |
| <u>W175</u> : V86          |            |                   | Y86: A29               |
| <u>K233</u> : E98          |            |                   | <u>R87</u> : N22       |
| <u>D279</u> : K40, Q136    |            |                   | M90: S144              |
|                            |            |                   | <u>W175</u> : N83      |
|                            |            |                   | R176: Q88              |
|                            |            |                   | F232: K95 (2x)         |
|                            |            |                   | <u>K233</u> : E98      |
|                            |            |                   | C240: I102 (3x), Y148  |
|                            |            |                   | L243: T148, F103 (2x)  |
|                            |            |                   | M244: K106, L145, V149 |
|                            |            |                   | T246: S144             |
|                            |            |                   | L248: F147             |
|                            |            |                   | <u>D279</u> : S36, A37 |
|                            |            |                   | L339: N23, E26 (2x)    |
|                            |            |                   | I340: L19, N23         |
|                            |            |                   | T344: F151 (2x)        |

---

257 **Molecular dynamics simulation**

258 A 25-ns molecular dynamics simulation was conducted to investigate the  
259 changes in the conformations of the complex. Figure 4 shows how the MMV G and

260 PmStx18 proteins changed in structure after the simulation. The complex remained  
261 intact throughout the simulation with minor conformational and structural changes in  
262 the site of attachment. Major changes in the structure of MMV G happened in the  
263 outer regions where contact with the solvent molecules is greater. The initial  
264 hydrogen bond interaction (Table 3) distances were monitored and plotted versus  
265 time (Figure 5). The analysis revealed that the hydrogen bond between R87 of MMV  
266 G and D25 of PmSTX18 remained intact after 25 ns. This suggests that R87 plays  
267 an important role in the binding affinity as additional to the high binding affinity  
268 contributed by hydrophobic interactions. Although not as intact as R87:D25, the  
269 hydrogen bond D279:K40 and W175:V86 are also notable as key interactions at the  
270 early stages of the simulation.

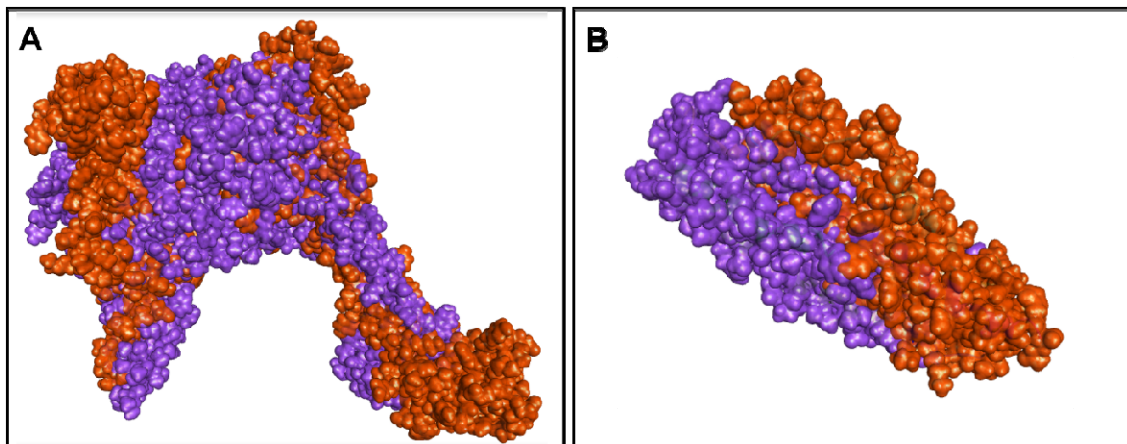

271  
272 **Figure 4.** Superimposition of (A) MMV G and (B) PmStx18 chains before (violet) and  
273 after (orange) the molecular dynamics simulation.

274



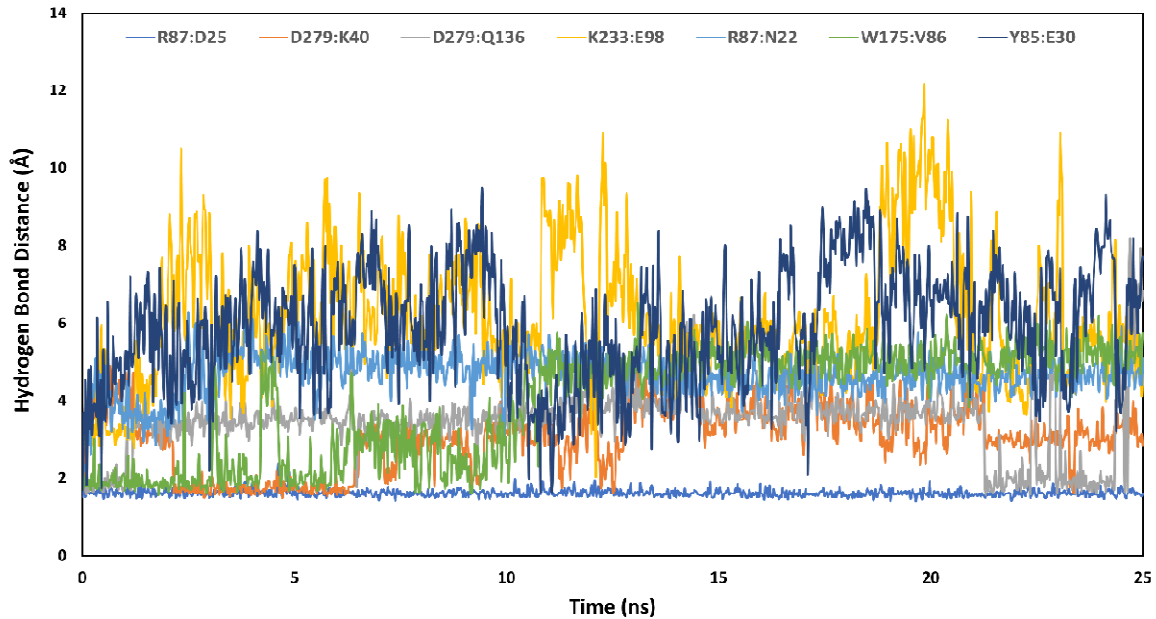

275

276 **Figure 5.** Monitoring of the initial hydrogen bond distances throughout the course of  
277 the simulation.

278

279 The interaction of MMV G with the putative PmSTX18 receptor could be a  
280 possible mechanism of entry of viral particles into host cells and subsequent  
281 infection and dissemination within the insect. This is further supported by previous  
282 studies which reported that STX18 of host cells is involved in mediating infection,  
283 such that of the *Bovine papillomavirus type 1* (BVP1) where the said receptor  
284 interacts with the viral capsid protein to facilitate infection (Bossis et al., 2005;  
285 Laniosz et al., 2007).

286 Viral glycoprotein interaction with cellular receptors has been a common  
287 mechanism of entry and infection for rhabdoviruses such as *Rabies virus* (RABV)  
288 and *Vesicular stomatitis virus* (VSV), prototype of genera *Lyssavirus* and  
289 *Vesiculovirus*, respectively (Belot et al., 2019). Additionally, RABV, VSV, the  
290 *Australian bat lyssavirus* (ABLV) as well as the rhabdoviral fish pathogen, *Infectious*



291 *hematopoietic necrosis virus* (IHNV) infect host cells through the clathrin-mediated  
292 endocytosis (CME) pathway (Guo et al., 2019; Liu et al., 2011; Sun et al., 2005; Weir  
293 et al., 2014). In connection, this study suggests a possible mechanism for the entry  
294 and infection of MMV through the interaction of the viral glycoprotein with the  
295 putative receptor PmSTX18 since it could be a similarity shared across studied  
296 species of Rhabdoviridae. Moreover, this is the first in silico analysis performed for  
297 MMV G-PmSTX18 interaction thus, the findings of this study will contribute  
298 significantly to future studies regarding PmSTX18.

299

## 300 **CONCLUSION**

301 In this study, computational and molecular interaction docking tools were used to  
302 compare the strength of the predicted protein-protein interaction of PmStx18 and  
303 MMV G. Also, molecular dynamics and simulations of the best docked protein-ligand  
304 structures revealed the dynamics information of their stability in the biological  
305 system. Based on our findings, we believe that the interaction model between the  
306 viral glycoprotein and insect vector SNARE protein can be a valuable initial step for  
307 developing a novel target specific bioinsecticide against the insect pest. Disrupting  
308 the structure stability may lead to inhibition of viral movement inside the host, which  
309 in response would restrict viral transmission to a healthy plant host.

310

311

312

313

314

## 315 **REFERENCES**

316

- 317 Alviar, K. B., Rotenberg, D., Martin, K. M., & Whitfield, A. E. (2022). Identification of  
318 interacting proteins of maize mosaic virus glycoprotein in its vector,  
319 &em&gt;Peregrinus maidis&lt;/em&gt;. *BioRxiv*, 2022.02.01.478665.  
320 <https://doi.org/10.1101/2022.02.01.478665>
- 321 Artimo, P., Jonnalagedda, M., Arnold, K., Baratin, D., Csardi, G., De Castro, E.,  
322 Duvaud, S., Flegel, V., Fortier, A., & Gasteiger, E. (2012). ExPASy: SIB  
323 bioinformatics resource portal. *Nucleic Acids Research*, 40(W1), W597–W603.
- 324 Barandoc-Alviar, K., Ramirez, G. M., Rotenberg, D., & Whitfield, A. E. (2017).  
325 *Analysis of Acquisition and Titer of Maize Mosaic Rhabdovirus in Its Vector* ,  
326 *Peregrinus maidis* ( Hemiptera□: Delphacidae ). 16(September), 10–17.  
327 <https://doi.org/10.1093/jisesa/iev154>
- 328 Belot, L., Albertini, A., & Gaudin, Y. (2019). *Structural and cellular biology of*  
329 *rhabdovirus entry*.
- 330 Bossis, I., Roden, R. B. S., Gambhira, R., Yang, R., Tagaya, M., Howley, P. M., &  
331 Meneses, P. I. (2005a). Interaction of tSNARE syntaxin 18 with the  
332 papillomavirus minor capsid protein mediates infection. *Journal of Virology*,  
333 79(11), 6723–6731.
- 334 Bossis, I., Roden, R. B. S., Gambhira, R., Yang, R., Tagaya, M., Howley, P. M., &  
335 Meneses, P. I. (2005b). Interaction of tSNARE Syntaxin 18 with the  
336 Papillomavirus Minor Capsid Protein Mediates Infection. *Journal of Virology*,  
337 79(11), 6723–6731. <https://doi.org/10.1128/jvi.79.11.6723-6731.2005>
- 338 Bowers, K. J., Chow, D. E., Xu, H., Dror, R. O., Eastwood, M. P., Gregersen, B. A.,  
339 Klepeis, J. L., Kolossvary, I., Moraes, M. A., & Sacerdoti, F. D. (2006). Scalable  
340 algorithms for molecular dynamics simulations on commodity clusters. *SC'06:*  
341 *Proceedings of the 2006 ACM/IEEE Conference on Supercomputing*, 43.
- 342 Chen, V. B., Arendall, W. B., Headd, J. J., Keedy, D. A., Immormino, R. M., Kapral,  
343 G. J., Murray, L. W., Richardson, J. S., & Richardson, D. C. (2010). MolProbity:  
344 all-atom structure validation for macromolecular crystallography. *Acta*  
345 *Crystallographica Section D: Biological Crystallography*, 66(1), 12–21.
- 346 Christoffer, C., Chen, S., Bharadwaj, V., Aderinwale, T., Kumar, V., Hormati, M., &  
347 Kihara, D. (2021). LZerD webserver for pairwise and multiple protein–protein  
348 docking. *Nucleic Acids Research*.
- 349 De Vries, S. J., Van Dijk, M., & Bonvin, A. M. J. J. (2010). The HADDOCK web  
350 server for data-driven biomolecular docking. *Nature Protocols*, 5(5), 883–897.
- 351 Dietzgen, R. G., Mann, K. S., & Johnson, K. N. (2016). *Plant Virus – Insect Vector*  
352 *Interactions□: Current and Potential Future Research Directions*. 1–21.  
353 <https://doi.org/10.3390/v8110303>
- 354 Fasshauer, D., Sutton, R. B., Brunger, A. T., & Jahn, R. (1998). Conserved structural  
355 features of the synaptic fusion complex: SNARE proteins reclassified as Q-and  
356 R-SNAREs. *Proceedings of the National Academy of Sciences*, 95(26), 15781–  
357 15786.
- 358 Guo, Y., Duan, M., Wang, X., Gao, J., Guan, Z., & Zhang, M. (2019). Early events in  
359 rabies virus infection—Attachment, entry, and intracellular trafficking. In *Virus*  
360 *Research* (Vol. 263, pp. 217–225). Elsevier B.V.  
361 <https://doi.org/10.1016/j.virusres.2019.02.006>
- 362 Hatsuzawa, K., Hirose, H., Tani, K., Yamamoto, A., Scheller, R. H., & Tagaya, M.  
363 (2000). Syntaxin 18, a SNAP receptor that functions in the endoplasmic  
364 reticulum, intermediate compartment, and cis-Golgi vesicle trafficking. *Journal of*  
365 *Biological Chemistry*, 275(18), 13713–13720.
- 366 Heo, L., Lee, H., & Seok, C. (2016). GalaxyRefineComplex: Refinement of protein-

- 367 protein complex model structures driven by interface repacking. *Scientific*  
368 *Reports*, 6(1), 1–10.
- 369 Jiménez-García, B., Pons, C., & Fernández-Recio, J. (2013). pyDockWEB: a web  
370 server for rigid-body protein–protein docking using electrostatics and  
371 desolvation scoring. *Bioinformatics*, 29(13), 1698–1699.
- 372 Jourdan-Ruf, C., MARCHAND, J.-L., PHAM, H., MARKHAM, P., & BUDUCA, C.  
373 (1995). Maize streak, maize stripe and maize mosaic virus diseases in the  
374 tropics (Africa and islands in the Indian Ocean). *Agriculture et Développement*  
375 *(Montpellier), DEC*, 55–69.
- 376 Kannan, M., Ismail, I., & Bunawan, H. (2018). Maize dwarf mosaic virus: From  
377 genome to disease management. *Viruses*, 10(9), 492.
- 378 Karavina, C. (2014). Maize streak virus: A review of pathogen occurrence, biology  
379 and management options for smallholder farmers. *African Journal of Agricultural*  
380 *Research*, 9(36), 2736–2742.
- 381 Klobasa, W., Chu, F.-C., Huot, O., Grubbs, N., Rotenberg, D., Whitfield, A. E., &  
382 Lorenzen, M. D. (2021). Microinjection of Corn Planthopper, *Peregrinus maidis*,  
383 Embryos for CRISPR/Cas9 Genome Editing. *Journal of Visualized Experiments:*  
384 *Jove*, 169.
- 385 Ko, J., Park, H., Heo, L., & Seok, C. (2012). GalaxyWEB server for protein structure  
386 prediction and refinement. *Nucleic Acids Research*, 40(W1), W294–W297.
- 387 Kozakov, D., Hall, D. R., Xia, B., Porter, K. A., Padhorny, D., Yueh, C., Beglov, D., &  
388 Vajda, S. (2017). The ClusPro web server for protein–protein docking. *Nature*  
389 *Protocols*, 12(2), 255–278.
- 390 Krissinel, E., & Henrick, K. (2007). Inference of macromolecular assemblies from  
391 crystalline state. *Journal of Molecular Biology*, 372(3), 774–797.
- 392 Laniosz, V., Nguyen, K. C., & Meneses, P. I. (2007). Bovine Papillomavirus Type 1  
393 Infection Is Mediated by SNARE Syntaxin 18. *Journal of Virology*, 81(14), 7435–  
394 7448. <https://doi.org/10.1128/jvi.00571-07>
- 395 Liu, H., Liu, Y., Liu, S., Pang, D.-W., & Xiao, G. (2011). Clathrin-Mediated  
396 Endocytosis in Living Host Cells Visualized through Quantum Dot Labeling of  
397 Infectious Hematopoietic Necrosis Virus. *Journal of Virology*, 85(13), 6252–  
398 6262. <https://doi.org/10.1128/jvi.00109-11>
- 399 Lu, H., Zhou, Q., He, J., Jiang, Z., Peng, C., Tong, R., & Shi, J. (2020). Recent  
400 advances in the development of protein–protein interactions modulators:  
401 mechanisms and clinical trials. *Signal Transduction and Targeted Therapy*, 5(1),  
402 1–23.
- 403 Mueller, D. S., Wise, K. A., Sisson, A. J., Allen, T. W., Bergstrom, G. C., Bosley, D.  
404 B., Bradley, C. A., Broders, K. D., Byamukama, E., & Chilvers, M. I. (2016).  
405 Corn yield loss estimates due to diseases in the United States and Ontario,  
406 Canada from 2012 to 2015. *Plant Health Progress*, 17(3), 211–222.
- 407 Pierce, B. G., Wiehe, K., Hwang, H., Kim, B.-H., Vreven, T., & Weng, Z. (2014).  
408 ZDOCK server: interactive docking prediction of protein–protein complexes and  
409 symmetric multimers. *Bioinformatics*, 30(12), 1771–1773.
- 410 Quignot, C., Rey, J., Yu, J., Tufféry, P., Guerois, R., & Andreani, J. (2018).  
411 InterEvDock2: an expanded server for protein docking using evolutionary and  
412 biological information from homology models and multimeric inputs. *Nucleic*  
413 *Acids Research*, 46(W1), W408–W416.
- 414 Rao, V. S., Srinivas, K., Sujini, G. N., & Kumar, G. N. (2014). Protein-protein  
415 interaction detection: methods and analysis. *International Journal of Proteomics*,  
416 2014.

- 417 Roy, A., Kucukural, A., & Zhang, Y. (2010). I-TASSER: a unified platform for  
418 automated protein structure and function prediction. *Nature Protocols*, 5(4),  
419 725–738.
- 420 Schneidman-Duhovny, D., Inbar, Y., Nussinov, R., & Wolfson, H. J. (2005).  
421 Geometry-based flexible and symmetric protein docking. *Proteins: Structure,*  
422 *Function, and Bioinformatics*, 60(2), 224–231.
- 423 Sun, X., Yau, V. K., Briggs, B. J., & Whittaker, G. R. (2005). Role of clathrin-  
424 mediated endocytosis during vesicular stomatitis virus entry into host cells.  
425 *Virology*, 338(1), 53–60. <https://doi.org/10.1016/j.virol.2005.05.006>
- 426 Tovchigrechko, A., & Vakser, I. A. (2006). GRAMM-X public web server for protein–  
427 protein docking. *Nucleic Acids Research*, 34(suppl\_2), W310–W314.
- 428 Weir, D. L., Laing, E. D., Smith, I. L., Wang, L. F., & Broder, C. C. (2014). Host cell  
429 virus entry mediated by Australian bat lyssavirus G envelope glycoprotein  
430 occurs through a clathrin-mediated endocytic pathway that requires actin and  
431 Rab5. *Virology Journal*, 11(1). <https://doi.org/10.1186/1743-422X-11-40>
- 432 Yan, Y., Tao, H., He, J., & Huang, S.-Y. (2020). The HDock server for integrated  
433 protein–protein docking. *Nature Protocols*, 15(5), 1829–1852.
- 434 Yang, J., Yan, R., Roy, A., Xu, D., Poisson, J., & Zhang, Y. (2015). The I-TASSER  
435 Suite: protein structure and function prediction. *Nature Methods*, 12(1), 7–8.
- 436 Yao, J., Rotenberg, D., Afsharifar, A., Barandoc-Alviar, K., & Whitfield, A. E. (2013).  
437 Development of RNAi methods for *Peregrinus maidis*, the corn planthopper.  
438 *PloS One*, 8(8), e70243.
- 439 Yoon, T.-Y., & Munson, M. (2018). SNARE complex assembly and disassembly.  
440 *Current Biology*, 28(8), R397–R401.
- 441 Zhang, Y. (2008). I-TASSER server for protein 3D structure prediction. *BMC*  
442 *Bioinformatics*, 9(1), 1–8.
- 443 Zhang, Y., & Skolnick, J. (2005). TM-align: a protein structure alignment algorithm  
444 based on the TM-score. *Nucleic Acids Research*, 33(7), 2302–2309.
- 445
